# Supplementary material for: High-density SNP arrays improve detection of HER2 amplification and polyploidy in breast tumors
Source: PubMed Central journal article supplement (PMC4326399; doi:10.1186/s12885-015-1035-1), 2015-02-06
Supplement: 12885_2015_1035_MOESM1_ESM.pdf [file 12885_2015_1035_MOESM1_ESM.pdf]

| Sample number | Type  | Grade | Grading | Diam | ER  | PgR |
|---------------|-------|-------|---------|------|-----|-----|
| 1             | LC    | 2     | 3+1+2   | 40   | 100 | 100 |
| 2             | DC    | 3     | 3+3+3   | 60   | 0   | 0   |
| 3             | LC    | 2     | 3+1+1   | 73   | 0   | 0   |
| 4             | DC    | 2     | 3+1+2   | 11   | 100 | 20  |
| 5             | DC    | 1     | 2+1+2   | 15   | 100 | 100 |
| 6             | DC    | 3     | 3+3+3   | 19   | 0   | 0   |
| 7             | DC    | 3     | 3+3+3   | 60   | 0   | 0   |
| 8             | DC    | 3     | 2+3+3   | 19   | 0   | 0   |
| 9             | DC    | 3     | 3+3+3   | 24   | 0   | 0   |
| 10            | DC    | 2     | 2+1+3   | 25   | 100 | 90  |
| 11            | DC    | 3     | 3+3+3   | 25   | 0   | 0   |
| 12            | LC    | 2     | 3+1+2   | 22   | 100 | 80  |
| 13            | DC    | 1     | 2+1+2   | 18   | 70  | 100 |
| 14            | LC    | 2     | 3+1+2   | 21   | 80  | 20  |
| 15            | DC    | 3     | 3+2+3   | 21   | 100 | 100 |
| 16            | LC    | 2     | 3+1+2   | 20   | 0   | 0   |
| 17            | DC    | 3     | 3+2+3   | 20   | 0   | 0   |
| 18            | DC    | 2     | 3+2+2   | 40   | 50  | 100 |
| 19            | DC    | 2     | 3+1+2   | 25   | 80  | 0   |
| 20            | LC    | 2     | 3+1+2   | 14   | 100 | 0   |
| 21            | DC    | 3     | 3+2+3   | 14   | 40  | 10  |
| 22            | DC    | 2     | 2+2+3   | 23   | 100 | 90  |
| 23            | DC/LC | 2     | 3+2+2   | 21   | 95  | 100 |
| 24            | DC    | 2     | 3+1+2   | 30   | 100 | 50  |
| 25            | DC    | 2     | 3+2+2   | 22   | 100 | 100 |
| 26            | DC    | 3     | 3+3+3   | 40   | 100 | 90  |
| 27            | DC    | 1     | 2+1+2   | 25   | 80  | 20  |
| 28            | DC    | 3     | 3+3+3   | 50   | 0   | 0   |
| 29            | DC    | 2     | 3+1+2   | 22   | 80  | 80  |
| 30            | DC    | 3     | 3+2+3   | 23   | 60  | 20  |
| 31            | DC    | 3     | 3+3+3   | 30   | 100 | 0   |
| 32            | DC    | 3     | 3+3+3   | 40   | 100 | 90  |
| 33            | DC    | 2     | 3+1+2   | 12   | 100 | 100 |
| 34            | DC    | 3     | 3+3+2   | 21   | 60  | 0   |
| 35            | DC    | 3     | 3+3+2   | 15   | 90  | 60  |
| 36            | DC    | 2     | 3+2+2   | 30   | 99  | 90  |
| 37            | DC    | 3     | 2+3+3   | 18   | 0   | 0   |
| 38            | DC    | 3     | 3+2+3   | 15   | 0   | 0   |
| 39            | MC    |       |         | 35   | 100 | 90  |
| 40            | DC    | 2     | 2+2+2   | 12   | 99  | 99  |
| 41            | DC    | 3     | 3+2+3   | 21   | 100 | 100 |
| 42            | DC    | 2     | 2+2+3   | 15   | 50  | 40  |
| 43            | DC    | 3     | 3+3+3   | 21   | 0   | 0   |
| 44            | DC    | 3     | 3+3+3   | 22   | 0   | 0   |
| 45            | DC    | 3     | 3+2+3   | 25   | 0   | 0   |
| 46            | LC    | 2     | 3+1+2   | 21   | 90  | 100 |

|    |    |   |       |     |     |     |
|----|----|---|-------|-----|-----|-----|
| 47 | DC | 2 | 2+2+2 | 18  | 100 | 100 |
| 48 | DC | 2 | 2+2+2 | 12  | 100 | 80  |
| 49 | MC |   |       | 12  | 60  | 10  |
| 50 | LC | 2 | 3+1+2 | 35  | 100 | 20  |
| 51 | DC | 3 | 3+3+3 | 39  | 100 | 0   |
| 52 | DC | 2 | 3+2+2 | 18  | 100 | 100 |
| 53 | DC | 2 | 3+2+2 | 38  | 100 | 0   |
| 54 | DC | 2 | 3+1+3 | 21  | 0   | 0   |
| 55 | DC | 2 | 3+1+2 | 100 | 100 | 15  |
| 56 | DC | 2 | 3+1+3 | 30  | 90  | 90  |
| 57 | DC | 2 | 3+1+2 | 22  | 90  | 0   |
| 58 | DC | 3 | 3+3+3 | 27  | 0   | 0   |
| 59 | DC | 2 | 3+1+2 | 21  | 0   | 0   |
| 60 | DC | 2 | 3+2+2 | 17  | 100 | 90  |
| 61 | DC | 3 | 3+3+3 | 50  | 0   | 0   |
| 62 | DC | 3 | 3+3+3 | 65  | 0   | 0   |
| 63 | DC | 2 | 3+1+2 | 21  | 50  | 80  |
| 64 | DC | 3 | 2+3+3 | 22  | 90  | 0   |
| 65 | DC | 3 | 3+3+3 | 32  | 0   | 0   |
