# Supplementary material for: High-density SNP arrays improve detection of HER2 amplification and polyploidy in breast tumors
Source: PubMed Central journal article supplement (PMC4326399; doi:10.1186/s12885-015-1035-1), 2015-02-06

SNP 500K amplifications    SNP 6.0 amplifications  
SNP 500K deletions        SNP 6.0 deletions

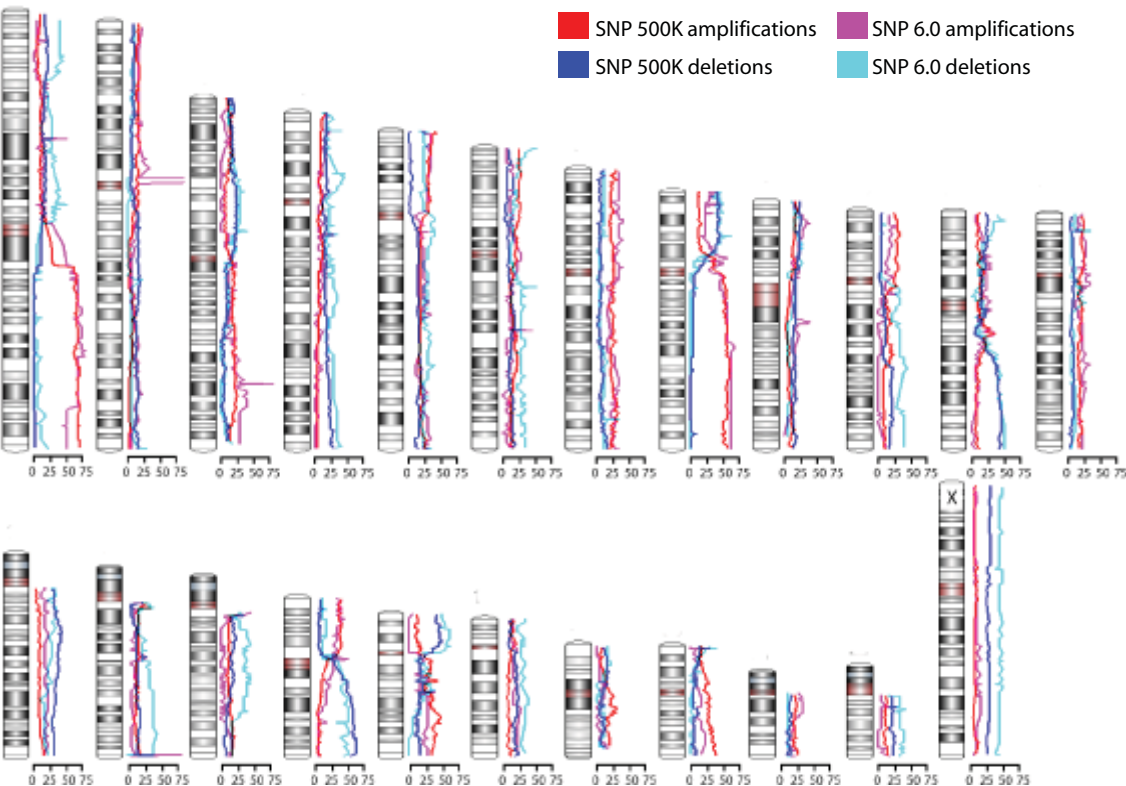

Supplement: 12885_2015_1035_MOESM2_ESM.pdf [file 12885_2015_1035_MOESM2_ESM.pdf]
