# Supplementary material for: High-density SNP arrays improve detection of HER2 amplification and polyploidy in breast tumors
Source: PubMed Central journal article supplement (PMC4326399; doi:10.1186/s12885-015-1035-1), 2015-02-06

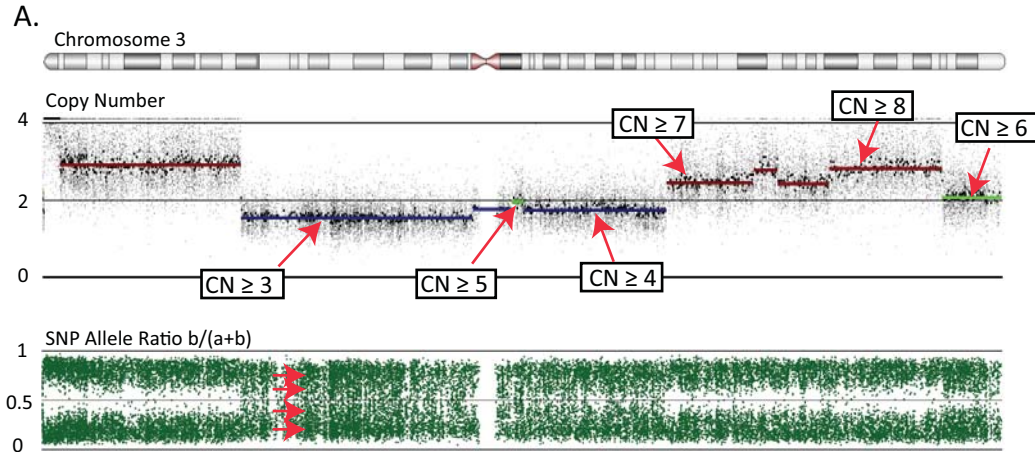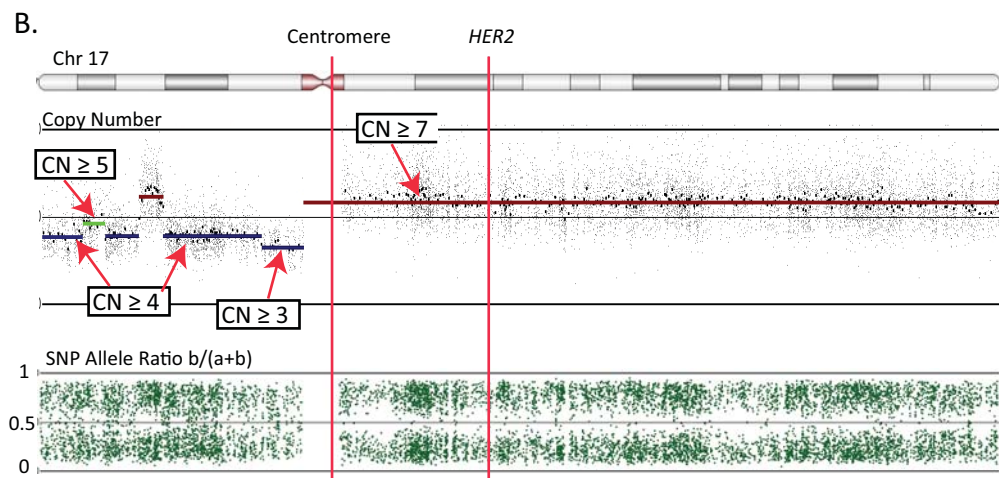

**C.** FISH with 3D rendering of confocal image stack

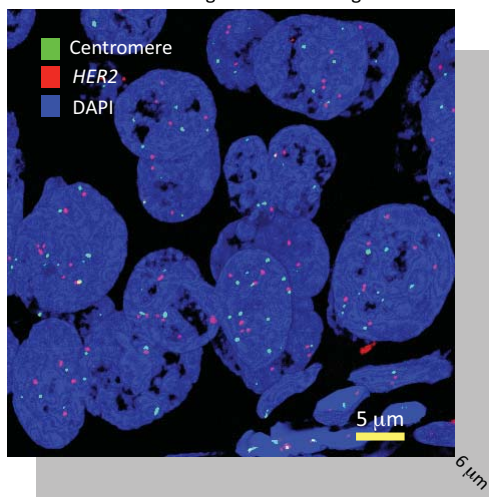

Supplement: 12885_2015_1035_MOESM3_ESM.pdf [file 12885_2015_1035_MOESM3_ESM.pdf]
